# Supplementary material for: Multilayer Thin-Film Optical Filters for Reflectance-Based Malaria Diagnostics
Source: MDPI journal article supplement (doi:10.3390/mi12080890), 2021-07-28
Supplement: s1 [file s1]

## Supplementary material

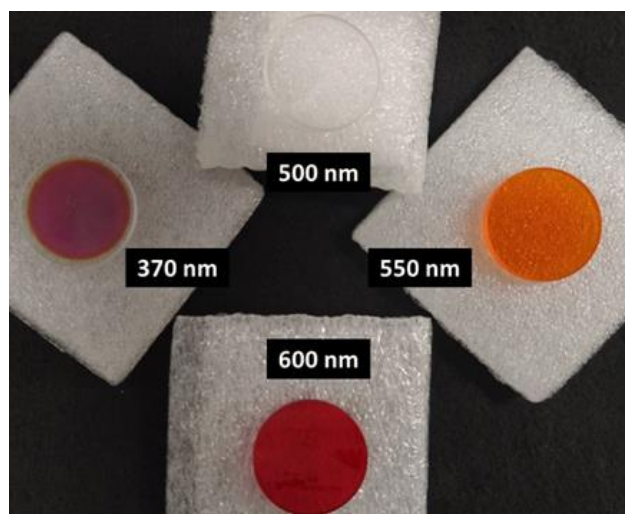

Figure S1: Photographs of examples of the commercial long pass (370 nm, 550 nm and 600 nm) and short pass (500 nm) filters, used in the experimental assays.

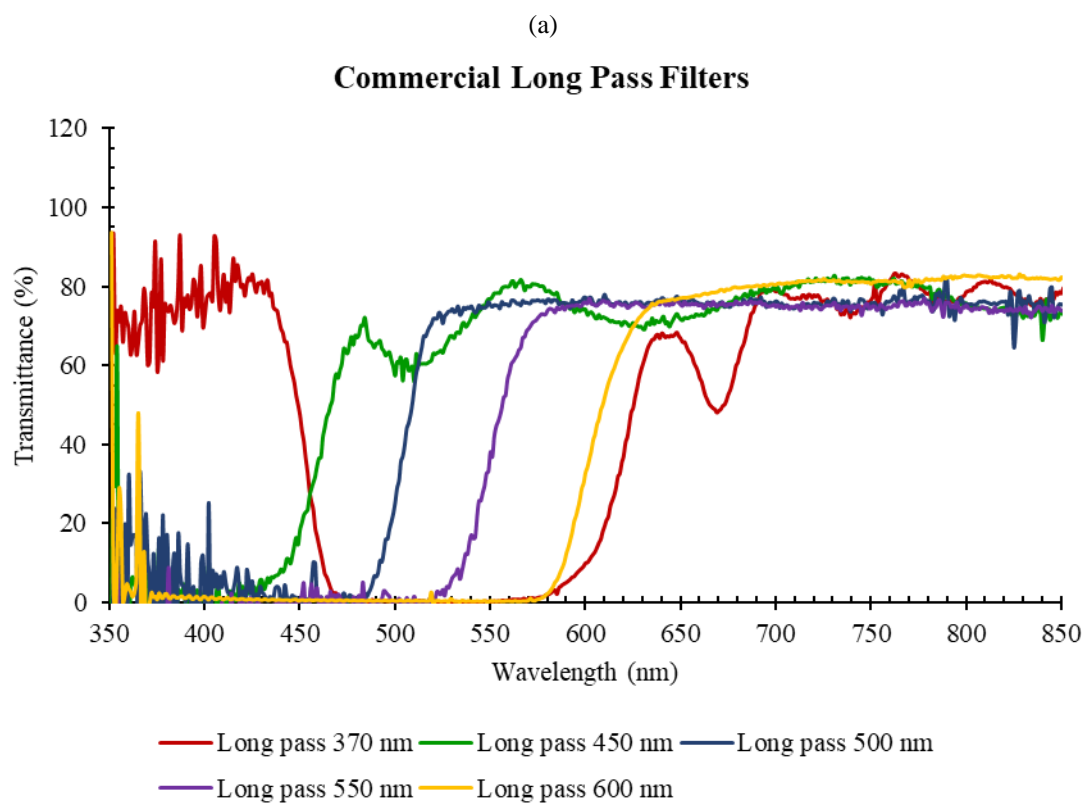

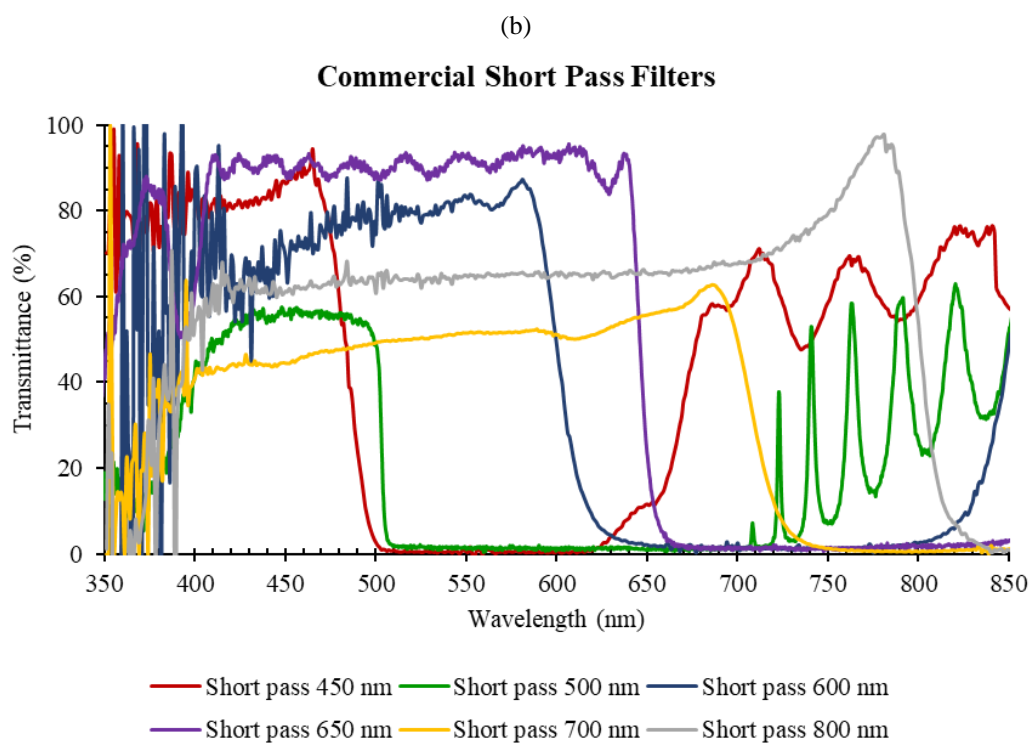

Figure S2: Spectra of the commercial long (a) and short (b) pass optical filters used in the experimental setup and listed in Figure 6 (b).
